# Supplementary material for: Fabrication and Characterization of a Thermophone Based on Laser-Scribed Graphene Intercalated with Multiwalled Carbon Nanotubes
Source: MDPI journal article supplement (doi:10.3390/nano11112874), 2021-10-28
Supplement: s1 [file s1]

## Supplementary Materials

# Fabrication and Characterization of a Thermophone Based on Laser-Scribed Graphene Intercalated with Multiwalled Carbon Nanotubes

Moin Rabbani <sup>1</sup>, Aashir Waheed Syed <sup>1</sup>, Syed Khalid <sup>2</sup> and Mohammad Ali Mohammad <sup>1,\*</sup>

<sup>1</sup> School of Chemical and Materials Engineering (SCME), National University of Sciences and Technology (NUST), Sector H-12, Islamabad 44000, Pakistan; moinfuust@gmail.com (M.R.); syedaashirwaheed@gmail.com (A.W.S); dr.ali@nust.edu.pk (M.A.M)

<sup>2</sup> Research Centre of Materials Science, Beijing Key Laboratory of Construction Tailorable Advanced Functional Materials and Green Applications, Beijing Institute of Technology, Beijing 100081, China; khalidsyedqau@yahoo.com (S.K.)

\* Correspondence: dr.ali@nust.edu.pk

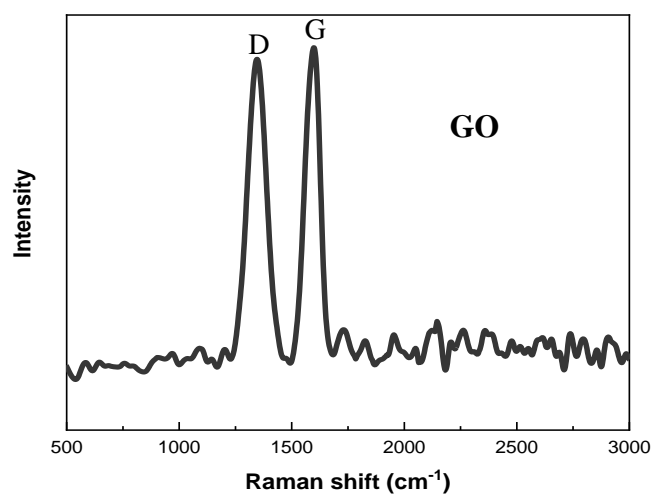

**Figure S1.** Raman spectra of graphene oxide

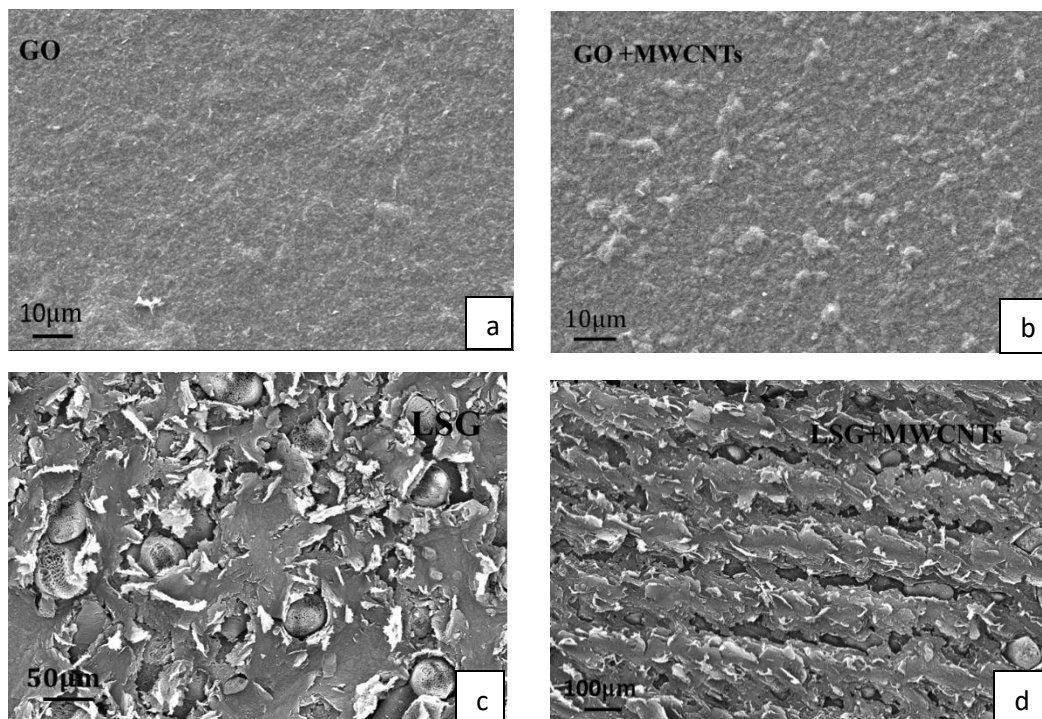

**Figure S2.** (a) SEM image of GO, (b) SEM image of GO+MWCNTs, (c) SEM image of LSG, (d) SEM image of LSG+MWCNTs

## Optical Profilometry of GO

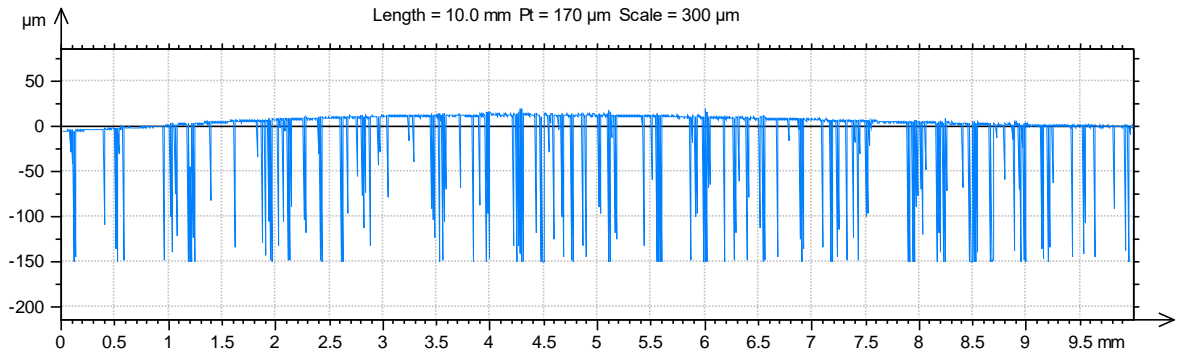

**Figure S3. (a):** Height profile of GO

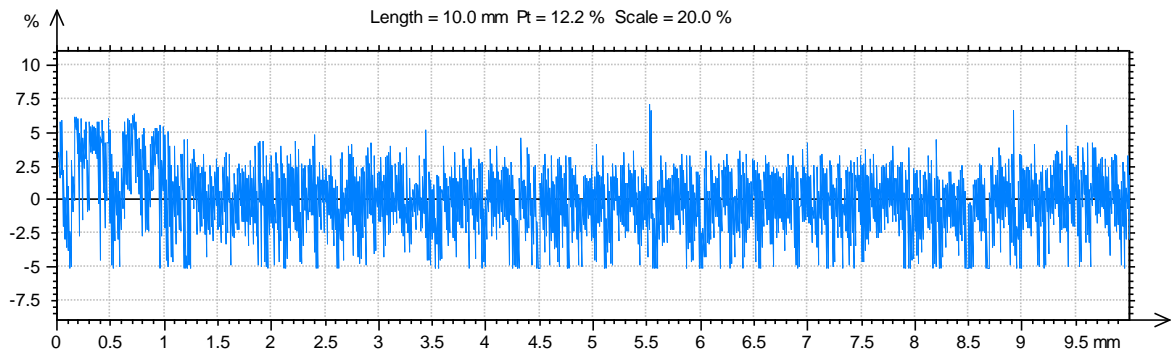

**Figure S3. (b):** Intensity profile of GO

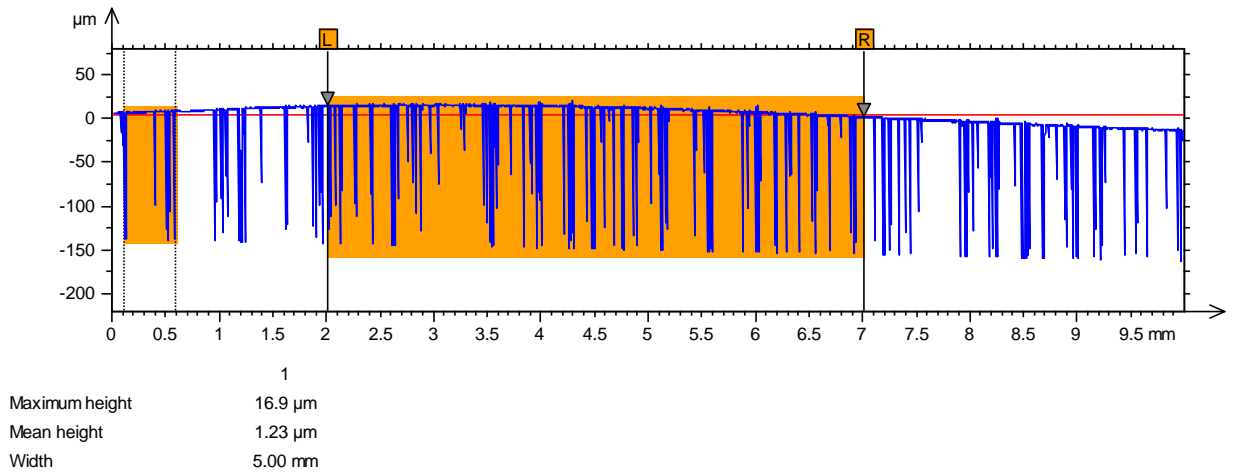

**Figure S3. (c):** Thickness profile of GO

# Optical profilometry of GO+MWCNTs

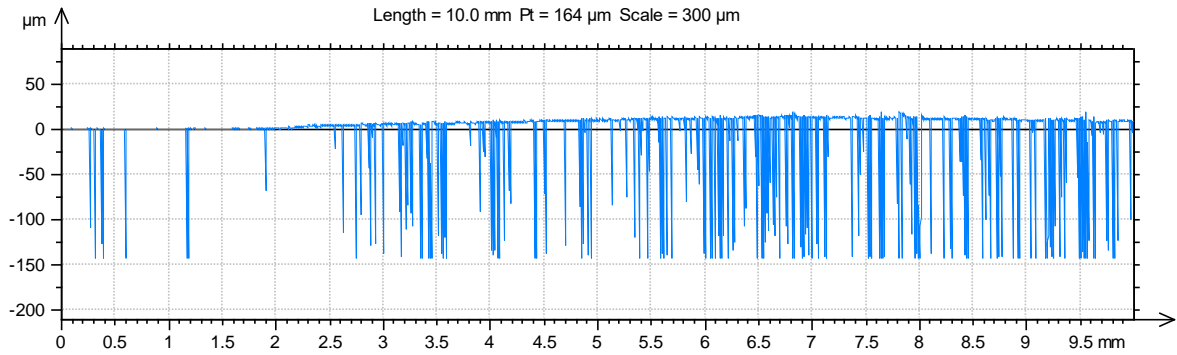

Figure S4. (a): Height profile of GO+MWCNTs

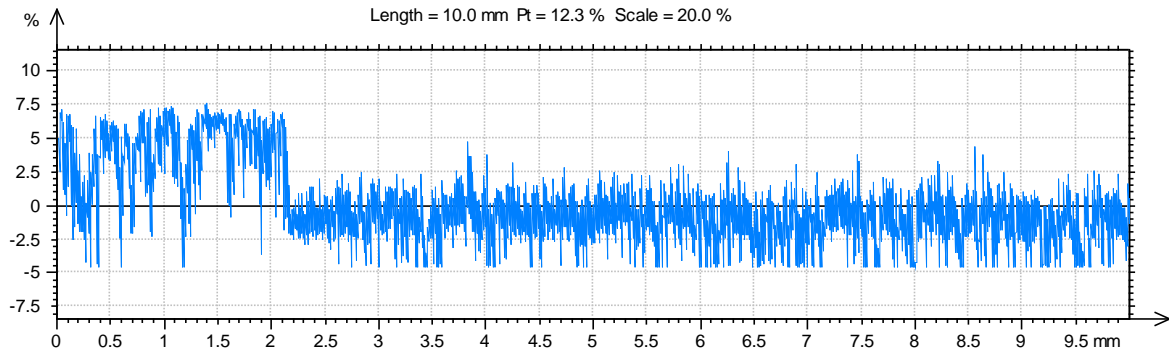

Figure S4. (b): Intensity profile of GO+MWCNTs

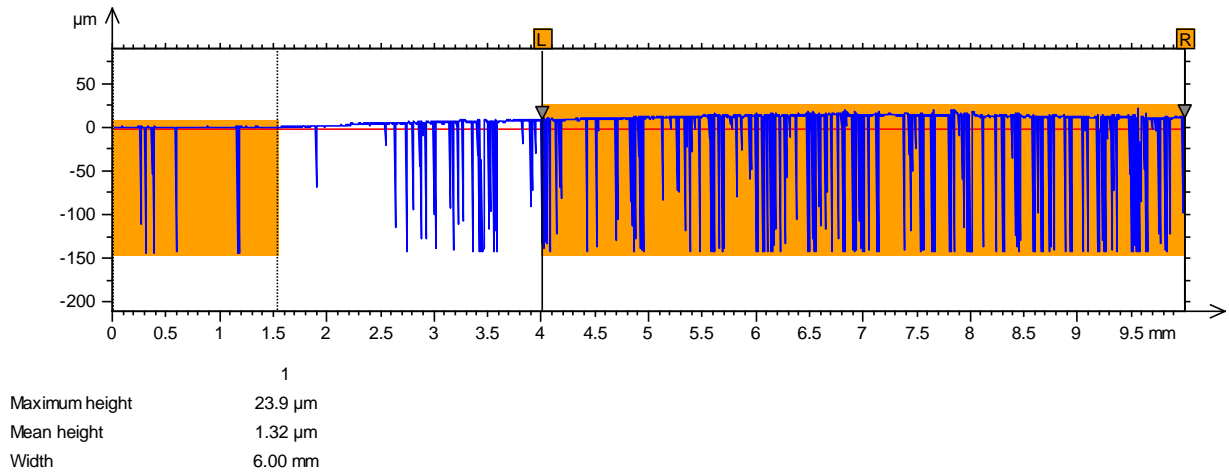

Figure S4. (c): Thickness profile of GO+MWCNTs

## Optical profilometry of laser scribed graphene (LSG)

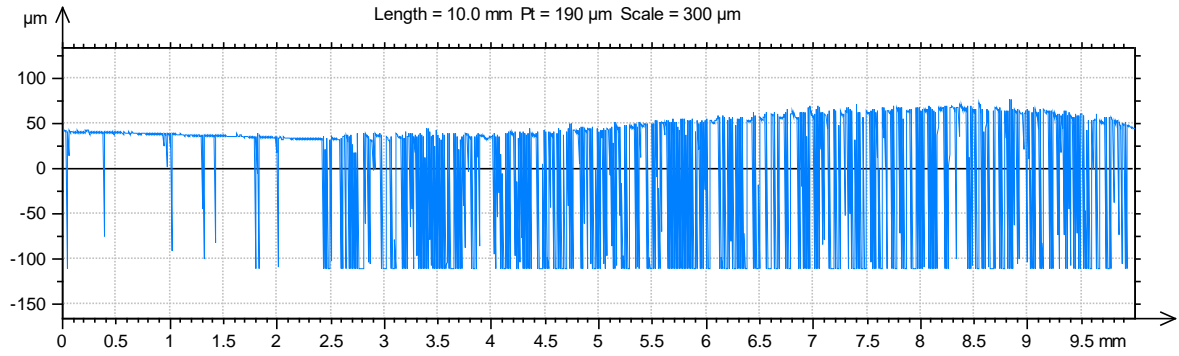

**Figure S5. (a):** Height profile of LSG

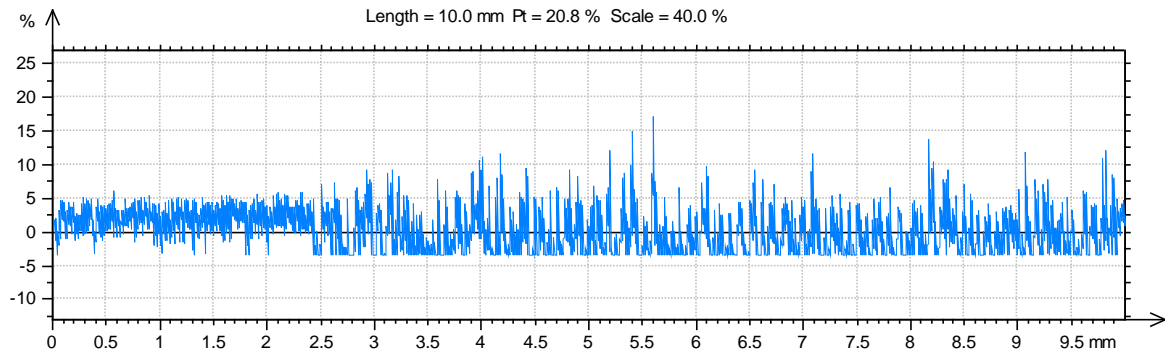

**Figure S5. (b):** Intensity profile of LSG

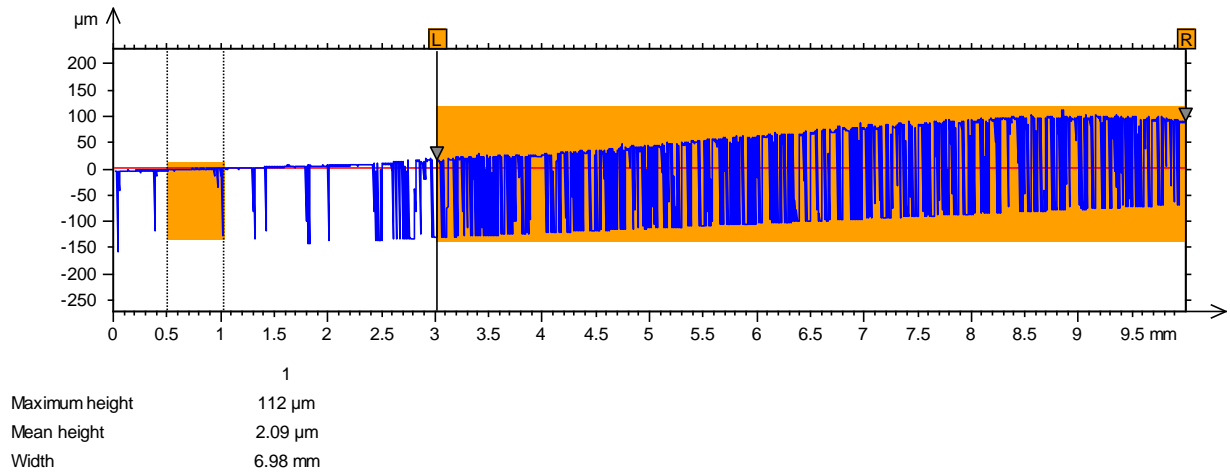

**Figure S5. (c):** Thickness profile of LSG

## Optical profilometry of multiwalled carbon nanotubes intercalated laser scribed graphene (LSG+MWCNTs)

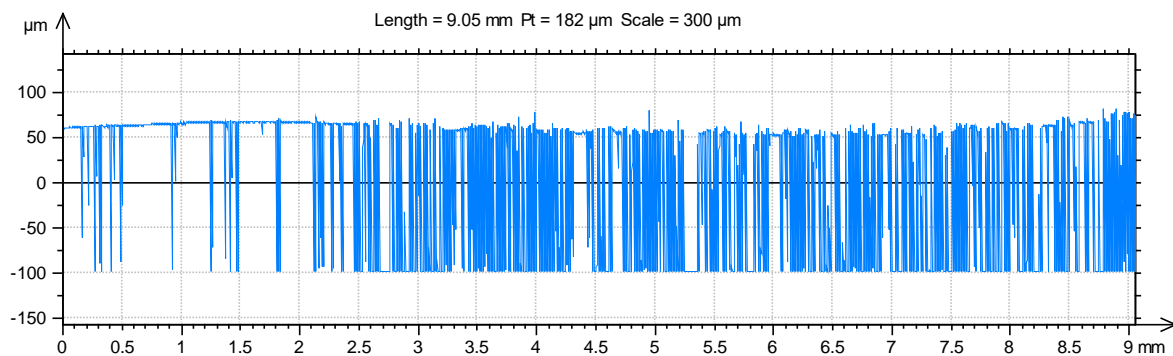

**Figure S6. (a):** Height profile of LSG+MWCNTs

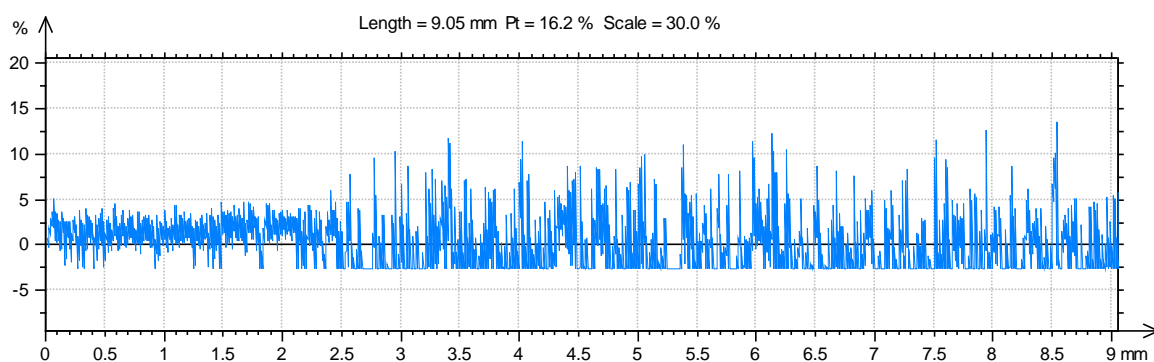

**Figure S6. (b):** Intensity profile of LSG+MWCNTs

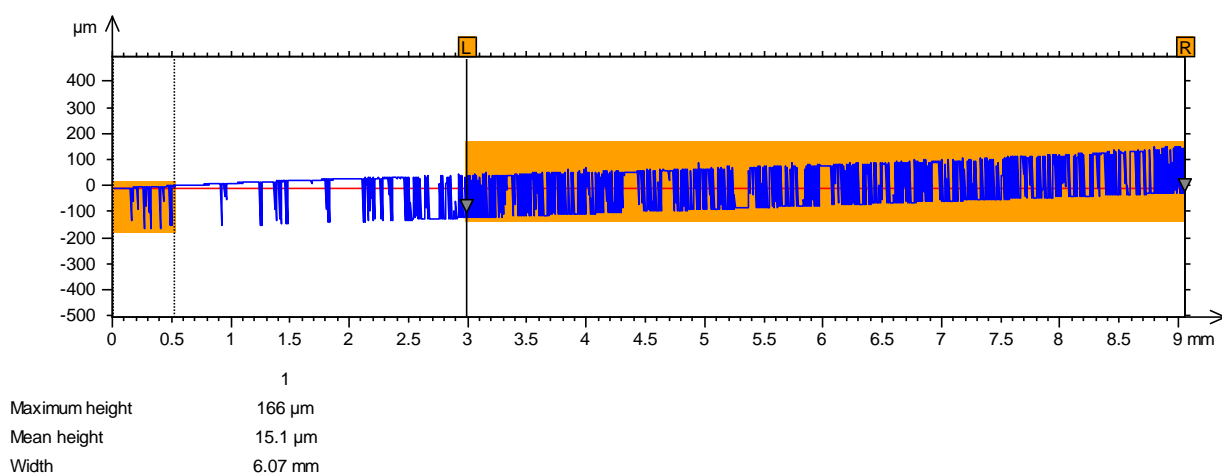

**Figure S6. (c):** Thickness profile of LSG+MWCNTs

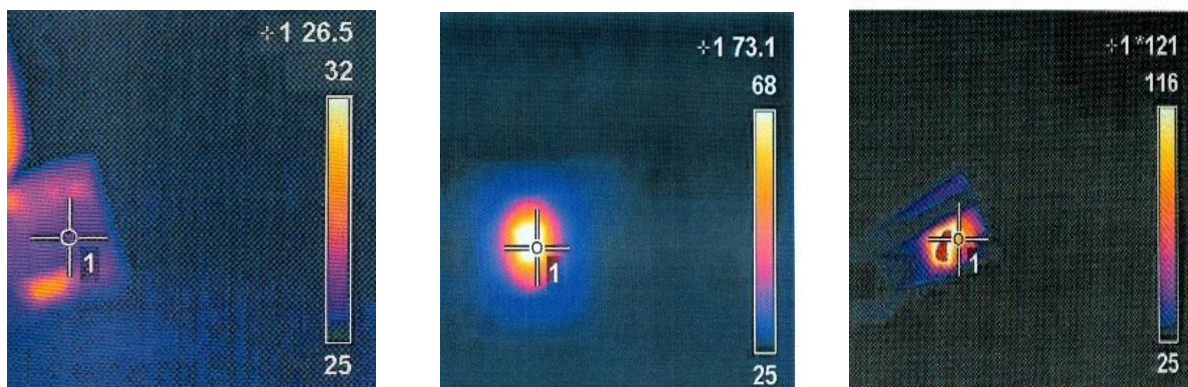

Figure S7. Thermal images of thermophones by applying (a) 0V to LSG based thermophone, (b) 9V DC to LSG based thermophone, (c) 9V DC to LSG+MWCNTs based thermophone
